# Supplementary material for: The role of Clostridium difficile in the paediatric and neonatal gut — a narrative review
Source: PubMed Central journal article supplement (PMC4902830; doi:10.1007/s10096-016-2639-3), 2016-04-23
Supplement: 10096_2016_2639_MOESM1_ESM.pdf [file 10096_2016_2639_MOESM1_ESM.pdf]

**Supplement 1: Description of studies included in epidemiological analysis**

| Year                      | Location       | Number of subjects | Study setting                                       | Frequency of colonisation | Authors                           |
|---------------------------|----------------|--------------------|-----------------------------------------------------|---------------------------|-----------------------------------|
| <b>Neonates &lt; 1/12</b> |                |                    |                                                     |                           |                                   |
| 2012                      | France         | 76                 | Inpatients on NICU                                  | 42%                       | Ferraris et al <sup>73</sup>      |
| 2011                      | France         | 62                 | Healthy outpatients/hospitalised infants            | 26%                       | Rousseau et al <sup>74</sup>      |
| 2005                      | Netherlands    | 100                | Healthy outpatients                                 | 22%                       | Penders et al <sup>34</sup>       |
| 2005                      | Japan          | 22                 | Healthy outpatients                                 | 18%                       | Tonooka et al <sup>75</sup>       |
| 2005                      | Japan          | 40                 | Post natal wards                                    | 2.5%                      | Matsuki et al <sup>76</sup>       |
| 1995                      | Poland         | 183                | Post natal wards                                    | 17%                       | Martirosian et al <sup>77</sup>   |
| 1994                      | Japan          | 67                 | Inpatients on NICU                                  | 61%                       | Kato et al <sup>27</sup>          |
| 1989                      | Sweden         | 340                | Post natal wards                                    | 22-28%                    | Tullus et al <sup>9</sup>         |
| 1986                      | Sweden         | 164                | Inpatients on NICU                                  | 4%                        | Bennet et al <sup>38</sup>        |
| 1986                      | Belgium        | 63                 | Hospitalised infants                                | 8%                        | Merida et al <sup>28</sup>        |
| 1985                      | Nigeria        | 22                 | Inpatients on NICU                                  | 23%                       | Rotimi et al <sup>78</sup>        |
| 1984                      | UK             | 150                | Post natal wards/healthy outpatients                | 31%                       | Bolton et al <sup>79</sup>        |
| 1984                      | UK             | 50                 | Post natal wards                                    | 62%                       | Tabaqchali et al <sup>36</sup>    |
| 1984                      | UK             | 92                 | Inpatients on NICU                                  | 71%                       | Al-Jumaili et al <sup>80</sup>    |
| 1983                      | Canada         | 30                 | Inpatients on NICU                                  | 47%                       | Han et al <sup>33</sup>           |
| 1983                      | UK             | 11                 | Inpatients on NICU                                  | 54.5%                     | Malamou-Ladas et al <sup>81</sup> |
| 1983                      | UK             | 40                 | Post natal wards                                    | 20%                       | Malamou-Ladas et al <sup>81</sup> |
| 1983                      | UK             | 59                 | Post natal wards                                    | 30%                       | Richardson et al <sup>82</sup>    |
| 1983                      | USA            | 36                 | Healthy outpatients                                 | 33%                       | Cooperstock et al <sup>8</sup>    |
| 1982                      | UK             | 451                | Post natal wards                                    | 2-52%                     | Larson et al <sup>25</sup>        |
| 1982                      | USA            | 51                 | Inpatients on NICU                                  | 55%                       | Donta <sup>29</sup>               |
| 1982                      | USA            | 105                | Post natal wards                                    | 10.5%                     | Donta <sup>29</sup>               |
| 1982                      | Australia      | 28                 | Inpatients on NICU                                  | 25%                       | Blakey et al <sup>30</sup>        |
| 1981                      | USA            | 45                 | Healthy outpatients                                 | 29%                       | Viscidi et al <sup>83</sup>       |
| 1981                      | Sweden         | 49                 | Diarrhoeal inpatients/outpatients/Nursery attendees | 4%                        | Holst et al <sup>84</sup>         |
| <b>Infants 1/12 – 1yr</b> |                |                    |                                                     |                           |                                   |
| 2011                      | France         | 189                | Healthy outpatients/hospitalised infants            | 38%                       | Rousseau et al <sup>74</sup>      |
| 2009                      | Iraq           | 46                 | Nosocomial diarrhoea                                | 17%                       | Alrifai et al <sup>85</sup>       |
| 2006                      | Netherlands    | 1032               | Healthy outpatients                                 | 25%                       | Penders et al <sup>37</sup>       |
| 2005                      | Japan          | 12                 | Nursery attendees                                   | 100%                      | Matsuki et al <sup>76</sup>       |
| 2005                      | USA            | 104                | Diarrhoeal outpatients                              | 16%                       | Denno et al <sup>86</sup>         |
| 2005                      | Canada         | 841                | Diarrhoeal inpatients                               | 10%                       | Tang et al <sup>87</sup>          |
| 1997                      | Sweden/Estonia | 56                 | Healthy outpatients                                 | 20%                       | Naaber et al <sup>88</sup>        |
| 1997                      | Sweden/Estonia | 34                 | Hospitalised infants                                | 21%                       | Naaber et al <sup>88</sup>        |
| 1989                      | Sweden         | 307-331            | Healthy outpatients                                 | 10-28%                    | Tullus et al <sup>9</sup>         |
| 1989                      | Korea          | 104                | Healthy outpatients                                 | 7%                        | Kim et al <sup>89</sup>           |
| 1989                      | Korea          | 231                | Diarrhoeal                                          | 16%                       | Kim et al <sup>89</sup>           |

|                          |           |                  |                                                             |       |                                   |
|--------------------------|-----------|------------------|-------------------------------------------------------------|-------|-----------------------------------|
|                          |           |                  | outpatients                                                 |       |                                   |
| 1989                     | USA       | 30 <sup>∞</sup>  | Nosocomial diarrhoea                                        | 13%   | Brady et al <sup>90</sup>         |
| 1986                     | Belgium   | 91               | Hospitalised infants                                        | 46%   | Merida et al <sup>28</sup>        |
| 1984                     | Mexico    | 100              | Hospitalised infants                                        | 19%   | Torres et al <sup>91</sup>        |
| 1984                     | Mexico    | 22               | Nursery attendees                                           | 27%   | Torres et al <sup>91</sup>        |
| 1984                     | UK        | 390*             | Diarrhoeal inpatients                                       | 49%   | Ellis et al <sup>92</sup>         |
| 1984                     | UK        | 118*             | Non-diarrhoeal inpatients                                   | 33%   | Ellis et al <sup>92</sup>         |
| 1983                     | USA       | 71               | Healthy outpatients                                         | 44%   | Cooperstock et al <sup>8</sup>    |
| 1982                     | Australia | 13               | Healthy outpatients                                         | 54%   | Stark et al <sup>93</sup>         |
| 1982                     | UK        | 116 <sup>§</sup> | Diarrhoeal inpatients/<br>outpatients                       | 36%   | Nash et al <sup>94</sup>          |
| 1982                     | Sweden    | 100 <sup>^</sup> | Healthy outpatients                                         | 17%   | Svedhem et al <sup>95</sup>       |
| 1981                     | Sweden    | 81               | Diarrhoeal inpatients/<br>outpatients/<br>Nursery attendees | 48%   | Holst et al <sup>84</sup>         |
| <b>Children &gt; 1yr</b> |           |                  |                                                             |       |                                   |
| 2013                     | USA       | 51               | Patients with non-inflammatory bowel conditions             | 12%   | Lamouse-Smith et al <sup>96</sup> |
| 2013                     | USA       | 145              | Patients with IBD                                           | 15%   | Lamouse-Smith et al <sup>96</sup> |
| 2011                     | France    | 43               | Healthy outpatients/<br>hospitalised infants                | 28%   | Rousseau et al <sup>74</sup>      |
| 2010                     | Poland    | 58               | Patients with IBD                                           | 69%   | Banaszkiewicz et al <sup>97</sup> |
| 2009                     | Iraq      | 35               | Nosocomial diarrhoea                                        | 26%   | Alrifai et al <sup>85</sup>       |
| 2009                     | Italy     | 141              | Oncology inpatients                                         | 6%    | Castagnola et al <sup>98</sup>    |
| 2008                     | Germany   | 411              | Oncology inpatients                                         | 6%    | Simon et al <sup>99</sup>         |
| 2006                     | USA       | 688              | Diarrhoeal outpatients                                      | 7%    | Klein et al <sup>54</sup>         |
| 2006                     | USA       | 604              | Healthy outpatients                                         | 3.5%  | Vernachio et al <sup>100</sup>    |
| 2005                     | India     | 250              | Nosocomial diarrhoea                                        | 19%   | Gogate et al <sup>101</sup>       |
| 2005                     | Japan     | 86               | Nursery attendees                                           | 41%   | Matsuki et al <sup>76</sup>       |
| 2005                     | USA       | 104              | Diarrhoeal outpatients                                      | 5%    | Denno et al <sup>86</sup>         |
| 2004                     | Egypt     | 104              | Oncology inpatients                                         | 14%   | El-Mahallawy et al <sup>51</sup>  |
| 2003                     | Brazil    | 91               | Healthy outpatients                                         | 0%    | Ferreira et al <sup>102</sup>     |
| 2003                     | Brazil    | 90               | Diarrhoeal outpatients                                      | 6%    | Ferreira et al <sup>102</sup>     |
| 2003                     | Brazil    | 63               | Healthy outpatients                                         | 3%    | Pinto et al <sup>103</sup>        |
| 2003                     | Brazil    | 51               | Diarrhoeal outpatients                                      | 12%   | Pinto et al <sup>103</sup>        |
| 2003                     | Brazil    | 30               | Diarrhoeal inpatients                                       | 7%    | Pinto et al <sup>103</sup>        |
| 2003                     | Brazil    | 66               | Inpatients on antibiotics/<br>neutropaenic                  | 6%    | Pinto et al <sup>103</sup>        |
| 2002                     | Canada    | 217              | Nosocomial diarrhoea                                        | 18%   | Langley et al <sup>104</sup>      |
| 2001                     | Turkey    | 100              | Nosocomial diarrhoea                                        | 16%   | Oguz et al <sup>105</sup>         |
| 1998                     | USA       | 267              | Diarrhoeal inpatients                                       | 13%   | Shastri et al <sup>106</sup>      |
| 1997                     | Italy     | 193              | Diarrhoeal inpatients<br>(with IBD)                         | 15.5% | Pascarella et al <sup>52</sup>    |
| 1997                     | Australia | 60               | Diarrhoeal oncology inpatients                              | 9%    | Burgner et al <sup>107</sup>      |

|      |           |     |                                                            |      |                               |
|------|-----------|-----|------------------------------------------------------------|------|-------------------------------|
| 1997 | Australia | 44  | Non-diarrhoeal oncology inpatients                         | 19%  | Burgner et al <sup>107</sup>  |
| 1995 | UK        | 214 | Diarrhoeal oncology inpatients                             | 13%  | Schuller et al <sup>108</sup> |
| 1989 | USA       | 24  | Nosocomial diarrhoea                                       | 21%  | Brady et al <sup>90</sup>     |
| 1989 | Sweden    | 304 | Healthy outpatients                                        | 3%   | Tullus et al <sup>9</sup>     |
| 1986 | Belgium   | 25  | Hospitalised children                                      | 4%   | Merida et al <sup>28</sup>    |
| 1986 | Sweden    | 200 | Healthy outpatients                                        | 15%  | Uhnoo et al <sup>109</sup>    |
| 1986 | Sweden    | 416 | Diarrhoeal inpatients/<br>outpatients                      | 14%  | Uhnoo et al <sup>109</sup>    |
| 1982 | Australia | 47  | Healthy outpatients                                        | 8.5% | Stark et al <sup>93</sup>     |
| 1981 | Sweden    | 88  | Diarrhoeal inpatients/<br>outpatients/Nursery<br>attendees | 2%   | Holst et al <sup>84</sup>     |

<sup>^</sup>Some participants 1 week-1 month but number not specified

<sup>∞</sup>Some participants 1-2 years but number not specified

<sup>\*</sup>Some participants > 1 year but number not specified

<sup>§</sup>Some participants 1-2 years but number not specified

### Supplement to:

#### The role of *Clostridium difficile* in the paediatric and neonatal gut – a narrative review

Lees EA<sup>1</sup>, Miyajima F<sup>1</sup>, Pirmohamed M<sup>1</sup>, Carrol ED<sup>2</sup>

#### Affiliations:

<sup>1</sup>University of Liverpool Institute of Translational Medicine, Wolfson Centre, Block A: Waterhouse Building, 1-5 Brownlow Street, Liverpool L69 3GL, United Kingdom

<sup>2</sup>Department of Clinical Infection, Microbiology and Immunology, Institute of Infection and Global Health, Ronald Ross Building, West Derby Street, Liverpool L69 7BE, United Kingdom

Contact details for corresponding author: [emilylees@doctors.org.uk](mailto:emilylees@doctors.org.uk)

Submitted to: EJCMIID
